# Supplementary material for: Comparative anatomical and transcriptomic analyses of the color variation of leaves in Aquilaria sinensis
Source: PeerJ journal article supplement (doi:10.7717/peerj.11586), 2021-06-22

ITS2

GS\_1

GS\_2

GS\_3

NS\_1

NS\_2

NS\_3

2000 bp

1000 bp

750 bp

500 bp

250 bp

100 bp

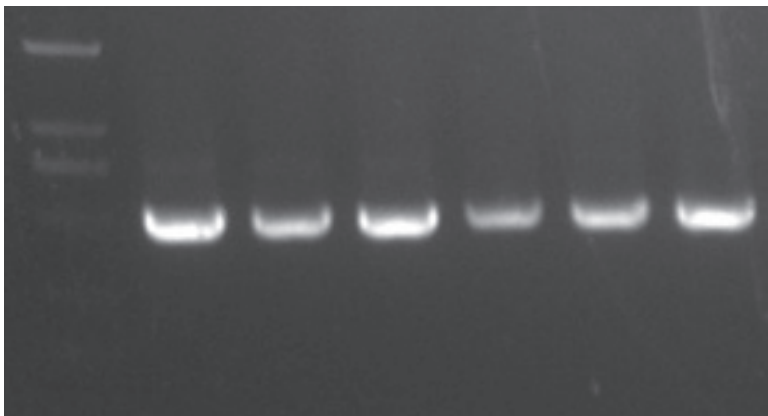

trnL-trnF

GS\_1

GS\_2

GS\_3

NS\_1

NS\_2

NS\_3

2000 bp

1000 bp

750 bp

500 bp

250 bp

100 bp

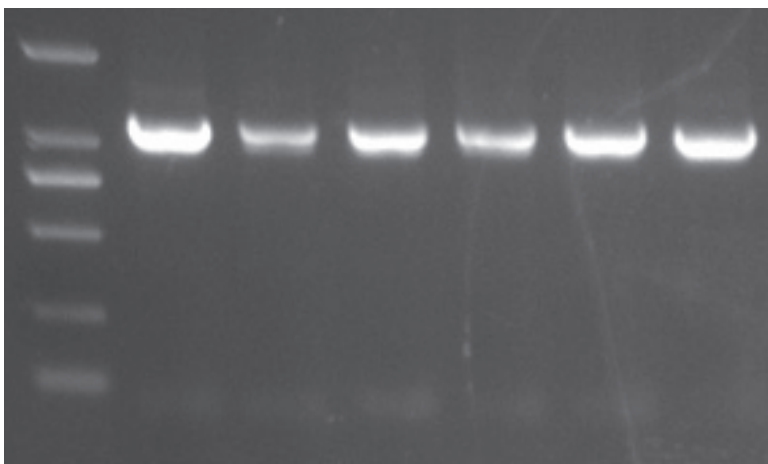

Supplement: Figure_S1.pdf [file Figure_S1.pdf]
