# Supplementary material for: Comparative anatomical and transcriptomic analyses of the color variation of leaves in Aquilaria sinensis
Source: PeerJ journal article supplement (doi:10.7717/peerj.11586), 2021-06-22
Supplement: Figure_S2.pdf [file Figure_S2.pdf]

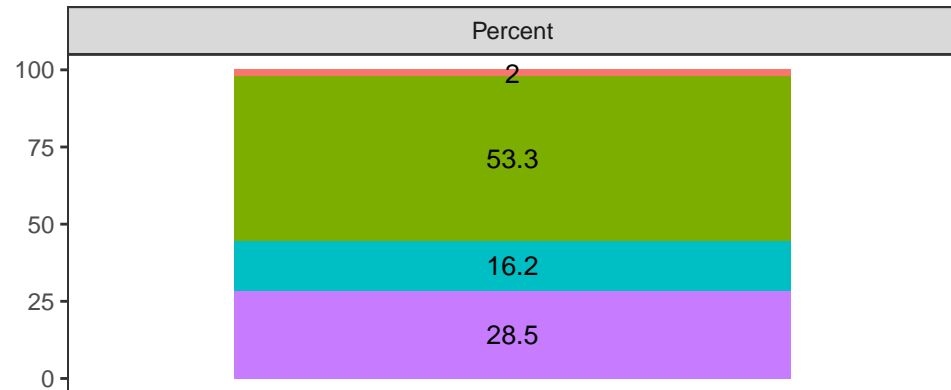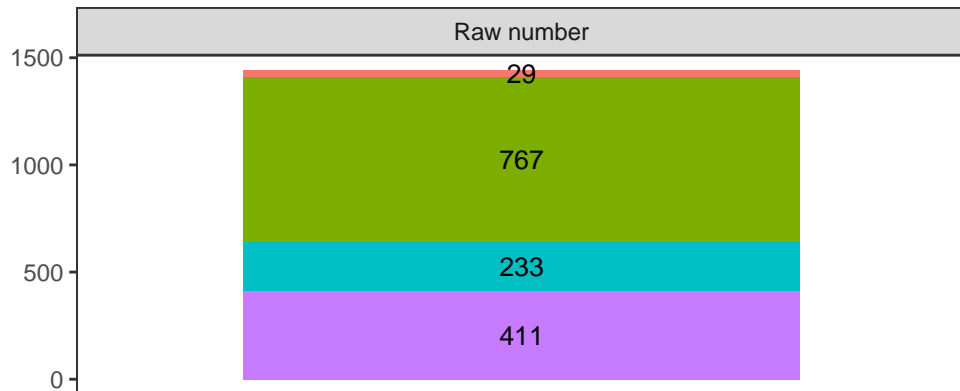

- Complete and duplicated BUSCOs
- Complete and single-copy BUSCOs
- Fragmented BUSCOs
- Missing BUSCOs
