# Supplementary material for: Comparative anatomical and transcriptomic analyses of the color variation of leaves in Aquilaria sinensis
Source: PeerJ journal article supplement (doi:10.7717/peerj.11586), 2021-06-22

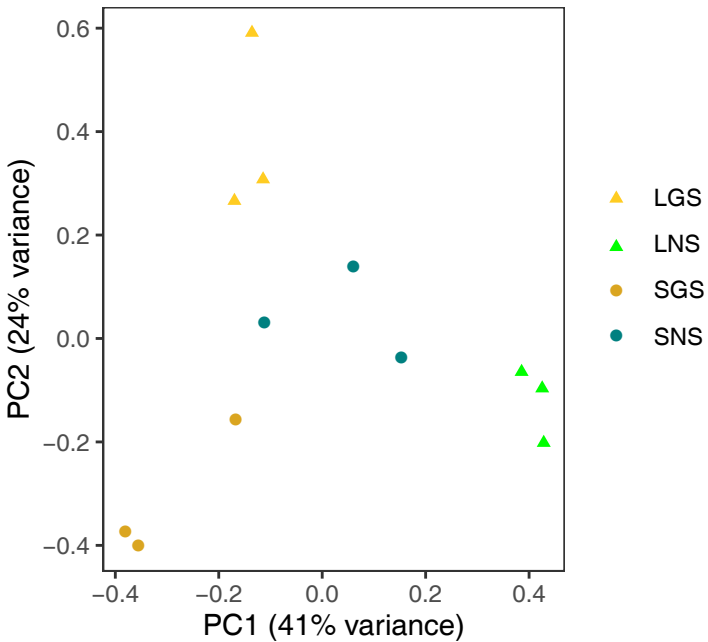

Supplement: Figure_S4.pdf [file Figure_S4.pdf]
