# Supplementary material for: Comparative anatomical and transcriptomic analyses of the color variation of leaves in Aquilaria sinensis
Source: PeerJ journal article supplement (doi:10.7717/peerj.11586), 2021-06-22

$t(21) = 4.40, p = < 0.001, \hat{r}_{\text{Pearson}} = 0.69, \text{CI}_{95\%} [0.39, 0.86], n_{\text{pairs}} = 23$

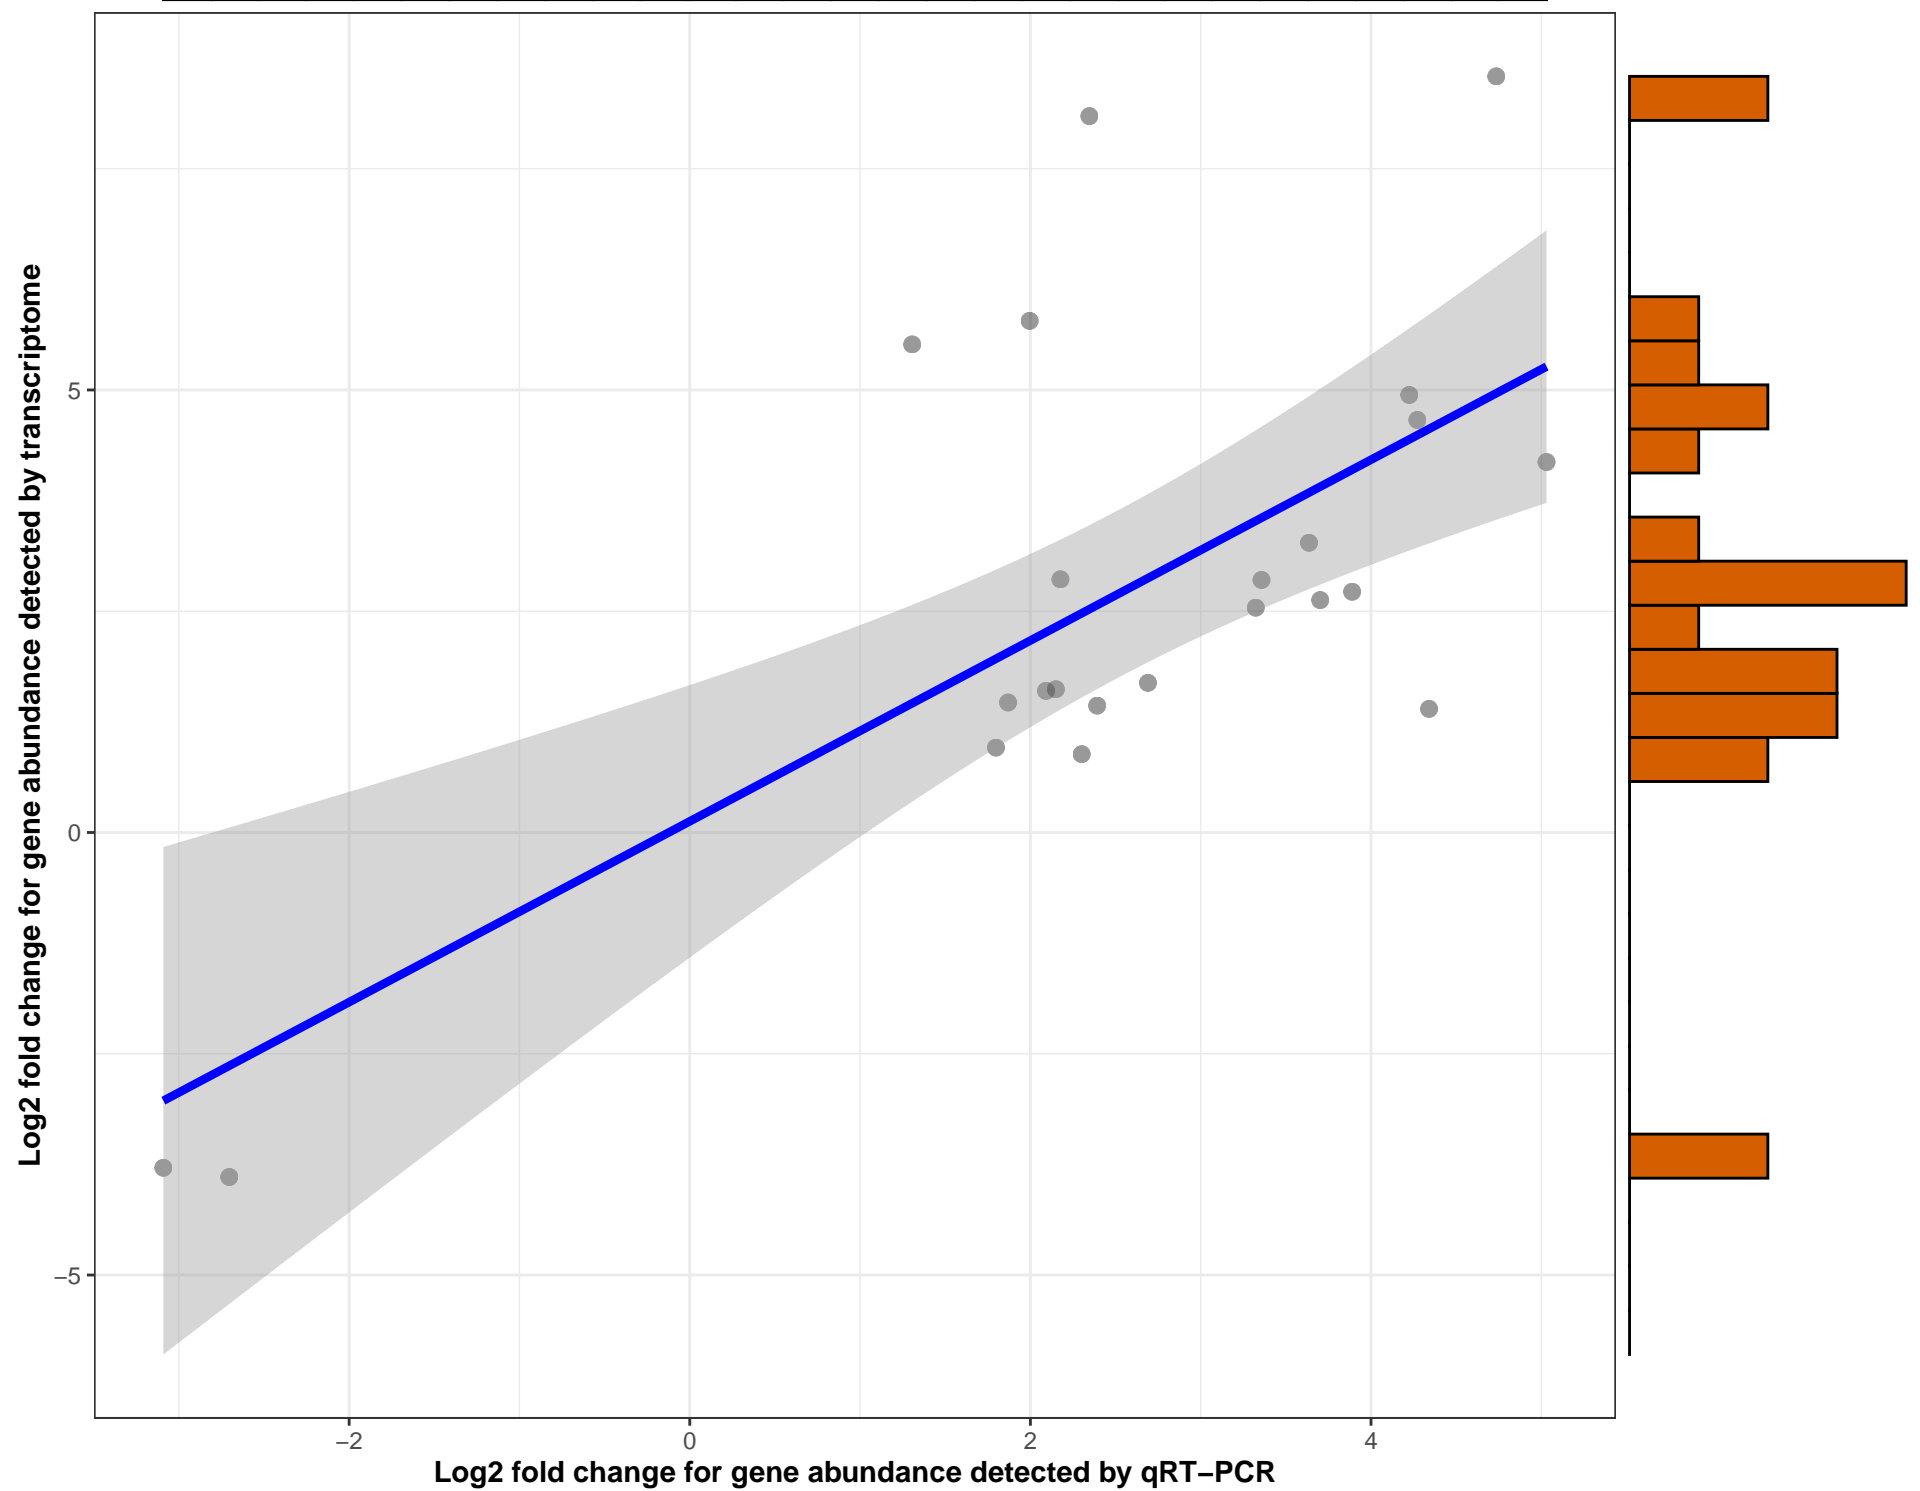

Supplement: Figure_S5.pdf [file Figure_S5.pdf]
