# Supplementary material for: Comparative anatomical and transcriptomic analyses of the color variation of leaves in Aquilaria sinensis
Source: PeerJ journal article supplement (doi:10.7717/peerj.11586), 2021-06-22
Supplement: Figure_S6.pdf [file Figure_S6.pdf]

**A**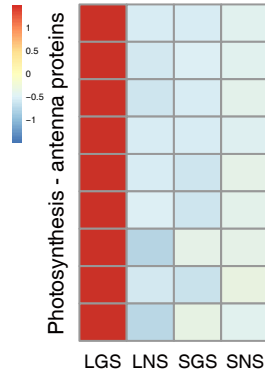**Gene ID**

E\_H254356\_c1\_g2  
E\_H259356\_c1\_g2  
E\_H258264\_c2\_g1  
E\_H258264\_c1\_g1  
E\_H264637\_c5\_g1  
E\_H267499\_c3\_g5  
E\_H262936\_c5\_g2  
E\_H256684\_c0\_g2  
E\_H263330\_c2\_g2

**Gene symbol**

LHCA1  
LHCA4  
LHCB1(1)  
LHCB1(2)  
LHCB2(1)  
LHCB2(2)  
LHCB2(3)  
LHCB4  
LHCB6

**B**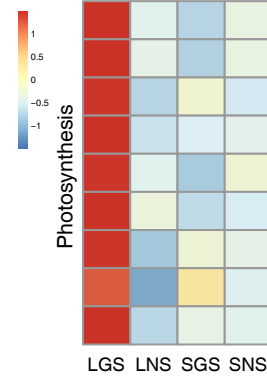**Gene ID**

E\_H263876\_c1\_g1  
E\_H266278\_c1\_g1  
E\_H263228\_c2\_g1  
E\_H263228\_c2\_g4  
E\_H249053\_c0\_g2  
E\_H263876\_c1\_g2  
E\_H261268\_c3\_g2  
E\_H262186\_c3\_g5  
E\_H263776\_c0\_g1

**Gene symbol**

PABO  
PSAF  
PSAG(1)  
PSAG(2)  
PSAO  
PSBO  
PSBP  
PSBQ  
PSBR

**C**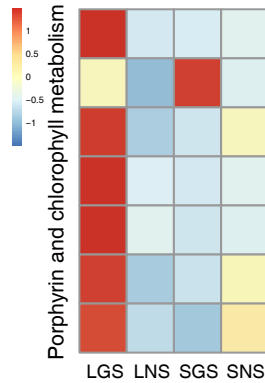**Gene ID**

E\_H263117\_c0\_g1  
E\_H248533\_c0\_g1  
E\_H255082\_c0\_g3  
E\_H265995\_c2\_g4  
E\_H265995\_c2\_g2  
E\_H252989\_c0\_g1  
E\_H266140\_c0\_g1

**Gene symbol**

CHLH  
CHLI  
CHLM  
CHLP(1)  
CHLP(2)  
CLH1  
HEME

**D**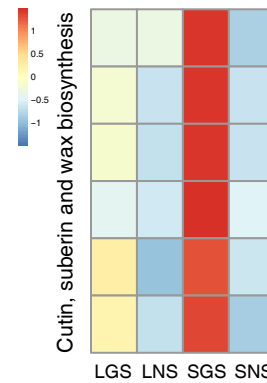**Gene ID**

E\_H256471\_c3\_g7  
E\_H253860\_c0\_g2  
E\_H259530\_c4\_g2  
E\_H266302\_c2\_g1  
E\_H258084\_c1\_g1  
E\_H258084\_c1\_g3

**Gene symbol**

CYP86A1  
CYP86A8  
CYP86B1  
FAR4  
HHT1(1)  
HHT1(2)
