# Supplementary material for: Comparative anatomical and transcriptomic analyses of the color variation of leaves in Aquilaria sinensis
Source: PeerJ. 2021 Jun 22;9:e11586. doi: 10.7717/peerj.11586 (PMC8231315; doi:10.7717/peerj.11586)
Supplement: Supplemental Information 11 [file peerj-09-11586-s011.xlsx]

## Sheet: 1. Total area of IP in midrib
Tissue	Value (μm2)
LGS	9897.05
LGS	7796.83
LGS	7796.03
LGS	7702.69
LGS	8894.41
LGS	7487.98
LGS	9179.22
LGS	6212.95
LGS	7906.99
LGS	7872.54
LNS	1847.86
LNS	1375.18
LNS	1424.85
LNS	1242.59
LNS	1712.47
LNS	1359.56
LNS	1450.09
LNS	1553.04
LNS	1585.88
LNS	1482.94

## Sheet: 2. PT thickness
Tissue	Value (μm)
LGS	27.0441
LGS	25.7256
LGS	28.2787
LGS	26.0293
LGS	33.4432
LGS	25.3636
LGS	28.8475
LGS	33.4109
LGS	29.119
LGS	33.7276
LGS	30.9418
LGS	26.9666
LGS	29.1578
LGS	23.0948
LGS	22.4808
LGS	22.8751
LGS	28.6084
LGS	28.6213
LGS	24.3165
LGS	24.394
LGS	25.6157
LGS	24.2454
LGS	26.5271
LGS	23.2823
LGS	31.517
LGS	27.8392
LGS	24.5492
LGS	25.5575
LGS	25.4153
LGS	25.7514
LGS	30.457
LGS	28.6859
LGS	29.1449
LGS	26.9278
LGS	24.6526
LGS	25.9259
LGS	21.5112
LGS	24.5298
LGS	22.5842
LGS	24.9952
LGS	27.5806
LGS	26.3073
LGS	25.4024
LGS	26.6693
LGS	22.7264
LGS	26.7727
LGS	30.3923
LGS	27.6453
LGS	27.5936
LGS	27.8004
LGS	26.1263
LGS	31.2585
LGS	29.565
LGS	23.3211
LGS	26.178
LGS	28.1107
LGS	28.7506
LGS	30.0304
LGS	28.4597
LGS	26.3008
LGS	29.9657
LGS	20.7226
LGS	27.167
LGS	25.8613
LGS	21.1169
LGS	29.6296
LGS	28.9897
LGS	28.2335
LGS	30.5475
LGS	25.9841
LGS	26.7274
LGS	26.9407
LGS	24.7625
LGS	27.8521
LGS	28.7376
LGS	27.7939
LGS	25.9001
LGS	25.1115
LGS	24.3423
LGS	25.5122
LGS	24.1678
LGS	25.6415
LGS	23.056
LGS	21.815
LGS	24.84
LGS	22.8557
LGS	25.467
LGS	22.4743
LGS	25.7191
LGS	28.0202
LGS	27.1863
LGS	28.7893
LGS	23.2241
LGS	22.3644
LGS	24.3488
LGS	23.4826
LGS	25.7126
LGS	21.55
LGS	27.3092
LGS	22.9526
LGS	23.4956
LGS	20.923
LGS	22.4097
LGS	24.4263
LGS	21.8279
LGS	23.7024
LGS	22.2416
LNS	35.2337
LNS	30.541
LNS	30.1209
LNS	32.4931
LNS	28.1236
LNS	30.0692
LNS	32.0083
LNS	30.625
LNS	24.2648
LNS	27.5031
LNS	27.9555
LNS	25.5963
LNS	33.482
LNS	29.7524
LNS	23.961
LNS	24.8142
LNS	24.3682
LNS	26.3008
LNS	30.179
LNS	30.2114
LNS	24.3552
LNS	33.301
LNS	27.3609
LNS	30.8707
LNS	24.7883
LNS	26.0811
LNS	32.8227
LNS	26.6046
LNS	29.0285
LNS	28.2464
LNS	24.0902
LNS	25.7126
LNS	29.3711
LNS	30.0239
LNS	27.4449
LNS	24.5621
LNS	32.1699
LNS	33.0812
LNS	33.1911
LNS	33.8698
LNS	30.9482
LNS	31.8467
LNS	26.6757
LNS	27.154
LNS	32.1763
LNS	39.629
LNS	30.6703
LNS	31.517
LNS	36.7526
LNS	33.7793
LNS	30.6056
LNS	31.7497
LNS	37.8191
LNS	30.0562
LNS	32.6611
LNS	30.0498
LNS	32.0147
LNS	28.6148
LNS	26.6628
LNS	29.9593
LNS	31.8596
LNS	29.7718
LNS	33.0295
LNS	30.9935
LNS	30.1273
LNS	25.7514
LNS	32.6676
LNS	29.8429
LNS	30.3794
LNS	27.3156
LNS	26.359
LNS	28.7635
LNS	30.5669
LNS	31.349
LNS	32.7064
LNS	35.4276
LNS	32.0277
LNS	31.8338
LNS	28.1818
LNS	28.9574
LNS	29.2483
LNS	30.7608
LNS	27.4966
LNS	33.398
LNS	32.5512
LNS	37.1598
LNS	29.5197
LNS	27.8004
LNS	29.1255
LNS	29.5262
LNS	31.4847
LNS	30.8319
LNS	31.2456
LNS	29.0867
LNS	32.3638
LNS	37.7028
LNS	30.1855
LNS	28.7182
LNS	26.7274
LNS	30.6897
LNS	32.5383
LNS	27.9167
LNS	25.3183
LNS	37.7545
LNS	32.1505
LNS	34.6907
LNS	33.1782
LNS	25.3054
LNS	29.3
LNS	32.6353
LNS	30.8125
LNS	28.3046
LNS	30.2437
LNS	26.7856
LNS	32.6546
LNS	27.0183
LNS	27.5806

## Sheet: 3. ST thickness
Tissue	Value (μm)
LGS	105.281
LGS	105.074
LGS	107.653
LGS	116.735
LGS	117.336
LGS	118.544
LGS	115.636
LGS	119.533
LGS	120.193
LGS	115.668
LGS	118.241
LGS	118.758
LGS	107.246
LGS	109.217
LGS	111.641
LGS	112.249
LGS	103.206
LGS	103.219
LGS	107.744
LGS	104.201
LGS	103.73
LGS	110.685
LGS	108.338
LGS	113.645
LGS	98.8495
LGS	102.489
LGS	110.226
LGS	117.801
LGS	116.566
LGS	114.627
LGS	119.223
LGS	112.54
LGS	115.914
LGS	117.782
LGS	114.886
LGS	116.062
LGS	104.208
LGS	104.363
LGS	102.372
LGS	102.392
LGS	96.2704
LGS	93.7625
LGS	92.5344
LGS	96.71
LGS	94.4154
LGS	109.986
LGS	102.702
LGS	104.977
LGS	90.2463
LGS	89.4512
LGS	93.8918
LGS	102.779
LGS	105.714
LGS	100.459
LGS	102.56
LGS	105.578
LGS	102.993
LGS	104.35
LGS	101.357
LGS	103.128
LGS	113.529
LGS	113.975
LGS	109.043
LGS	105.895
LGS	107.614
LGS	111.745
LGS	96.1024
LGS	93.9823
LGS	97.5761
LGS	99.2179
LGS	97.337
LGS	93.3747
LGS	93.1873
LGS	90.4531
LGS	90.6664
LGS	92.3728
LGS	94.8032
LGS	96.5807
LGS	93.9047
LGS	100.621
LGS	106.897
LGS	107.31
LGS	108.099
LGS	80.4731
LGS	86.9239
LGS	86.5102
LGS	93.8659
LGS	93.2131
LGS	96.6324
LGS	101.816
LGS	103.911
LGS	98.9593
LGS	102.598
LGS	98.6943
LGS	96.2252
LGS	114.918
LGS	118.053
LGS	113.121
LGS	118.984
LGS	117.969
LGS	117.594
LGS	121.214
LGS	126.663
LGS	132.803
LGS	125.389
LGS	124.943
LGS	125.609
LGS	87.4733
LGS	89.3995
LGS	91.2481
LGS	95.8955
LGS	97.2012
LGS	98.7525
LGS	94.396
LGS	91.6166
LGS	96.9944
LGS	95.9666
LGS	94.5252
LGS	89.322
LNS	83.7179
LNS	86.1224
LNS	91.3063
LNS	81.2294
LNS	83.6404
LNS	82.548
LNS	85.4437
LNS	88.4752
LNS	86.5878
LNS	89.2573
LNS	90.4079
LNS	88.8307
LNS	109.01
LNS	108.202
LNS	114.162
LNS	100.226
LNS	97.5373
LNS	100.239
LNS	88.2102
LNS	91.093
LNS	90.1428
LNS	85.9091
LNS	96.4579
LNS	88.1779
LNS	113.134
LNS	108.177
LNS	98.4681
LNS	99.3536
LNS	92.8641
LNS	96.0959
LNS	92.4375
LNS	93.0838
LNS	92.2306
LNS	87.0532
LNS	91.9979
LNS	96.7617
LNS	94.9066
LNS	95.6822
LNS	92.2629
LNS	83.4982
LNS	82.0955
LNS	85.8703
LNS	95.0682
LNS	87.6414
LNS	92.4181
LNS	81.3845
LNS	88.7338
LNS	87.4346
LNS	84.2673
LNS	84.3966
LNS	85.9931
LNS	90.8539
LNS	82.5286
LNS	89.1345
LNS	84.5388
LNS	87.0015
LNS	85.3726
LNS	89.0763
LNS	96.0442
LNS	101.758
LNS	101.816
LNS	97.3887
LNS	92.3147
LNS	90.466
LNS	92.78
LNS	86.5296
LNS	91.5972
LNS	94.8226
LNS	90.4919
LNS	93.3553
LNS	93.7237
LNS	96.6324
LNS	93.407
LNS	86.4521
LNS	95.4948
LNS	93.5557
LNS	90.5307
LNS	84.4936
LNS	90.2657
LNS	89.8197
LNS	90.5177
LNS	91.0154
LNS	94.215
LNS	87.6931
LNS	90.0653
LNS	87.5444
LNS	97.2594
LNS	98.1449
LNS	93.1743
LNS	103.316
LNS	98.8624
LNS	97.5244
LNS	88.6497
LNS	95.0811
LNS	92.9029
LNS	80.3697
LNS	89.6322
LNS	87.26
LNS	94.1568
LNS	88.9923
LNS	84.2479
LNS	87.0467
LNS	91.7911
LNS	88.4041
LNS	89.6839
LNS	83.9571
LNS	87.1372
LNS	93.2002
LNS	91.1835
LNS	80.848
LNS	87.0661
LNS	88.6691
LNS	82.91
LNS	85.6894
LNS	95.2104
LNS	98.4875
LNS	101.474

## Sheet: 4. UE thickness
Tissue	Value (μm)
LGS	13.2156
LGS	11.6703
LGS	11.2152
LGS	11.0533
LGS	11.8238
LGS	12.2889
LGS	14.2791
LGS	12.9089
LGS	13.0478
LGS	12.4347
LGS	11.5495
LGS	14.1523
LGS	14.7755
LGS	10.9257
LGS	14.897
LGS	13.823
LGS	13.6627
LGS	14.4326
LGS	13.5301
LGS	13.3513
LGS	12.0086
LGS	13.4261
LGS	11.4625
LGS	16.6493
LGS	12.7214
LGS	12.1743
LGS	10.7781
LGS	11.3924
LGS	9.51474
LGS	12.042
LGS	14.5707
LGS	12.0918
LGS	14.0529
LGS	11.41
LGS	14.6803
LGS	13.9815
LGS	14.6119
LGS	13.9384
LGS	12.674
LGS	13.3062
LGS	12.0253
LGS	10.8337
LGS	10.7595
LGS	10.1266
LGS	13.2911
LGS	15.203
LGS	15.8354
LGS	14.557
LGS	15.1899
LGS	15.8228
LGS	15.2425
LGS	12.6582
LGS	12.7998
LGS	10.2054
LGS	16.024
LGS	15.516
LGS	15.3994
LGS	15.8733
LGS	16.5043
LGS	13.924
LNS	12.7998
LNS	10.7781
LNS	12.674
LNS	12.0918
LNS	13.9815
LNS	14.6803
LNS	14.6119
LNS	10.1463
LNS	11.4625
LNS	12.7214
LNS	14.7755
LNS	11.41
LNS	13.3062
LNS	13.3513
LNS	13.924
LNS	15.2425
LNS	15.8733
LNS	12.6582
LNS	13.9384
LNS	13.4261
LNS	14.5707
LNS	15.203
LNS	15.8354
LNS	15.8228
LNS	16.5043
LNS	14.0529
LNS	11.3924
LNS	15.1899
LNS	13.5301
LNS	14.1523
LNS	12.9089
LNS	13.6627
LNS	14.2791
LNS	15.0441
LNS	13.0478
LNS	14.4326
LNS	12.4347
LNS	14.557
LNS	12.042
LNS	10.2054
LNS	15.3081
LNS	12.0253
LNS	17.7667
LNS	13.2911
LNS	17.7328
LNS	15.3994
LNS	16.4557
LNS	15.9363
LNS	15.516

## Sheet: 5. LE thickness
Tissue	Value (μm)
LGS	9.06191
LGS	5.83516
LGS	6.45446
LGS	7.40804
LGS	6.36068
LGS	6.99073
LGS	7.62126
LGS	6.60779
LGS	7.07616
LGS	7.6997
LGS	7.2163
LGS	5.6962
LGS	8.44409
LGS	7.82868
LGS	8.00577
LGS	8.22785
LGS	8.25216
LGS	9.51474
LGS	8.95072
LGS	9.68168
LGS	9.57769
LGS	8.60853
LGS	9.82543
LGS	10.4382
LGS	8.32465
LGS	6.96202
LGS	10.2054
LGS	10.3031
LGS	12.0918
LGS	9.21533
LGS	8.88334
LGS	10.1463
LGS	10.7595
LGS	9.49367
LGS	10.9257
LGS	10.1266
LGS	10.8337
LGS	11.41
LGS	7.59494
LGS	8.86076
LGS	10.7781
LGS	11.4625
LGS	11.6703
LGS	10.0072
LNS	8.22785
LNS	8.88334
LNS	9.57769
LNS	10.8337
LNS	8.25216
LNS	7.62126
LNS	7.59494
LNS	8.86076
LNS	8.95072
LNS	8.32465
LNS	10.2054
LNS	7.6997
LNS	7.82868
LNS	9.51474
LNS	10.3031
LNS	10.1266
LNS	8.44409
LNS	7.2163
LNS	8.60853
LNS	9.06191
LNS	7.07616
LNS	9.21533
LNS	13.3062
LNS	11.41
LNS	10.1463
LNS	9.49367
LNS	6.99073
LNS	10.7781
LNS	9.68168
