# Supplementary material for: Comparative anatomical and transcriptomic analyses of the color variation of leaves in Aquilaria sinensis
Source: PeerJ. 2021 Jun 22;9:e11586. doi: 10.7717/peerj.11586 (PMC8231315; doi:10.7717/peerj.11586)
Supplement: Supplemental Information 12 [file peerj-09-11586-s012.xlsx]

## Sheet: 1. Single IP area
Tissue	Value (μm)
SGS	2514.02
SGS	2624.18
SGS	962.186
SGS	1263.82
SGS	844.015
SGS	3332
SGS	1667.2
SGS	1319.1
SGS	1561.45
SGS	2391.44
SGS	1446.88
SGS	890.082
SGS	1170.49
SGS	893.286
SGS	920.125
SGS	1332.72
SGS	1969.24
SGS	3012.34
SGS	2417.88
SGS	362.923
SGS	1136.84
SGS	1923.17
SGS	377.744
SGS	1243.39
SGS	1232.17
SGS	1170.89
SGS	615.286
SGS	1175.69
SGS	1028.68
SGS	1722.88
SGS	730.252
SGS	1352.75
SGS	1008.25
SGS	809.966
SGS	1524.19
SGS	2287.69
SGS	1460.5
SGS	2385.03
SGS	2970.68
SGS	2553.68
SGS	2393.45
SGS	3468.19
SGS	3664.88
SGS	2040.94
SGS	2312.13
SGS	1757.33
SGS	2067.78
SGS	630.909
SGS	1504.97
SGS	407.787
SGS	2226.41
SGS	2203.17
SGS	3800.27
SGS	2034.13
SGS	4875.42
SGS	2662.63
SGS	2413.88
SGS	1589.09
SGS	1933.98
SGS	1289.46
SGS	1717.67
SGS	4911.47
SGS	1436.47
SGS	1817.42
SGS	2193.96
SGS	3420.53
SGS	2694.68
SGS	1972.84
SGS	1824.23
SGS	1906.35
SGS	3346.42
SGS	1887.52
SGS	1336.32
SGS	1261.42
SGS	705.015
SGS	1756.13
SGS	1103.99
SGS	1129.63
SGS	2477.17
SGS	696.603
SGS	2461.95
SGS	1479.33
SGS	1635.56
SGS	3449.37
SGS	865.647
SGS	1361.16
SGS	1473.32
SGS	453.052
SGS	2136.68
SGS	2172.33
SGS	678.978
SGS	1158.07
SGS	215.911
SGS	2259.65
SGS	1023.47
SGS	1971.24
SGS	2456.34
SGS	1207.34
SGS	1192.12
SGS	1317.9
SGS	973.802
SGS	1187.71
SGS	1707.66
SGS	622.496
SGS	1339.93
SGS	188.672
SGS	1135.64
SGS	1020.27
SGS	1831.84
SGS	989.024
SGS	930.139
SGS	845.618
SGS	1712.87
SGS	933.745
SGS	2185.15
SGS	979.01
SGS	386.557
SGS	2488.78
SGS	730.652
SGS	1740.11
SGS	2053.76
SGS	2510.82
SGS	2997.12
SGS	1183.3
SGS	2586.93
SGS	775.917
SGS	2634.99
SGS	1868.29
SGS	1607.51
SGS	1201.33
SGS	1565.45
SGS	1955.22
SGS	1790.18
SGS	1374.38
SGS	4557.76
SGS	1026.28
SGS	2173.13
SGS	1997.28
SGS	1458.5
SGS	1210.14
SGS	1898.73
SGS	1525
SGS	1807
SGS	4862.2
SGS	3320.78
SGS	1130.43
SGS	1578.67
SGS	2614.97
SGS	382.951
SGS	1583.08
SGS	2938.23
SGS	465.07
SGS	6459.7
SGS	1527
SGS	2859.32
SGS	2158.31
SGS	2203.57
SGS	1174.89
SGS	625.3
SGS	1036.69
SGS	991.828
SGS	521.551
SGS	666.96
SGS	1205.74
SGS	721.439
SGS	1105.99
SGS	1066.34
SGS	1063.53
SGS	531.966
SGS	2333.36
SGS	1527.8
SGS	2224
SGS	755.087
SGS	1484.94
SGS	2563.29
SGS	497.917
SGS	2680.26
SGS	1875.1
SGS	1256.21
SGS	2365.41
SGS	944.16
SGS	1865.09
SGS	2404.66
SGS	2258.85
SGS	1033.09
SGS	1291.06
SGS	4290.18
SGS	3039.98
SGS	694.6
SGS	1765.34
SGS	1424.85
SGS	1531.81
SGS	1770.95
SGS	1256.61
SGS	1881.11
SGS	807.563
SGS	1796.59
SGS	3086.04
SGS	538.776
SGS	1447.68
SGS	2248.04
SGS	5604.47
SGS	2692.68
SGS	1913.56
SNS	2373.02
SNS	7176.33
SNS	5884.47
SNS	7319.74
SNS	2371.82
SNS	6440.88
SNS	3566.74
SNS	5406.59
SNS	3797.47
SNS	2767.18
SNS	5877.26
SNS	5103.75
SNS	5620.49
SNS	5244.75
SNS	5588.45
SNS	5384.55
SNS	5069.3
SNS	7594.14
SNS	3436.95
SNS	5874.06
SNS	6401.22
SNS	6749.72
SNS	6458.1
SNS	7497.2
SNS	3659.27
SNS	3890
SNS	3502.24
SNS	3670.09
SNS	5479.49
SNS	6810.61
SNS	5564.41
SNS	5398.57
SNS	3706.54
SNS	3820.7
SNS	6437.27
SNS	3661.27
SNS	4292.18
SNS	5815.17
SNS	5333.68
SNS	4236.5
SNS	6733.3
SNS	4427.18
SNS	4045.83
SNS	3786.65
SNS	2053.76
SNS	4035.41
SNS	4433.98
SNS	5626.5
SNS	6519.39
SNS	3835.92
SNS	3649.66
SNS	5475.48
SNS	5453.45
SNS	5235.54
SNS	4891.84
SNS	4867.01
SNS	4722.8
SNS	7669.84
SNS	3891.6
SNS	3419.32
SNS	3648.85
SNS	3936.87
SNS	7086.2
SNS	5585.64
SNS	3733.78
SNS	5257.17
SNS	5571.22
SNS	6408.83
SNS	4702.77
SNS	4484.06
SNS	4257.73
SNS	4825.75
SNS	3311.97
SNS	3415.32
SNS	6250.2
SNS	5461.46
SNS	4410.75
SNS	4268.95
SNS	3849.14
SNS	4361.88
SNS	6319.5
SNS	5660.55
SNS	8526.68
SNS	3333.2
SNS	5464.67
SNS	4094.7
SNS	5596.06
SNS	3216.23
SNS	1927.98
SNS	5090.13
SNS	2860.52
SNS	6376.78
SNS	3082.84
SNS	3076.43
SNS	6418.04
SNS	4895.05
SNS	4512.1
SNS	4743.63
SNS	1261.82
SNS	4789.7
SNS	5870.85
SNS	9021.39
SNS	5715.43
SNS	8495.03
SNS	7416.28
SNS	5436.23
SNS	3675.69
SNS	3748.6
SNS	4692.76
SNS	5223.52
SNS	7272.87
SNS	2853.71
SNS	5474.68
SNS	3523.87
SNS	2252.04
SNS	3310.77
SNS	2965.87
SNS	3111.28
SNS	2227.21
SNS	3491.43
SNS	1748.52
SNS	2226.81

## Sheet: 2. Percentage of IP in xylem
Tissue	Value
SGS	0.169272
SGS	0.178867
SGS	0.176648
SGS	0.212398
SGS	0.244391
SGS	0.231306
SGS	0.230395
SGS	0.232423
SGS	0.206187
SGS	0.222543
SGS	0.210738
SGS	0.213584
SGS	0.226373
SGS	0.223874
SGS	0.156794
SGS	0.158599
SGS	0.172877
SGS	0.159232
SGS	0.180059
SGS	0.179956
SGS	0.213838
SGS	0.201002
SGS	0.17951
SGS	0.189203
SGS	0.194827
SGS	0.196042
SGS	0.224045
SGS	0.223888
SGS	0.211656
SGS	0.19446
SGS	0.230962
SGS	0.235375
SGS	0.141418
SGS	0.167504
SGS	0.160993
SGS	0.16294
SGS	0.183541
SNS	0.210108
SNS	0.238389
SNS	0.226428
SNS	0.229975
SNS	0.267528
SNS	0.23928
SNS	0.212247
SNS	0.25119
SNS	0.218915
SNS	0.224218
SNS	0.191753
SNS	0.202452
SNS	0.210655
SNS	0.197423
SNS	0.19291
SNS	0.206136
SNS	0.214178
SNS	0.198025
SNS	0.204465
SNS	0.190735
SNS	0.215466
SNS	0.193486
SNS	0.176566
SNS	0.196927
SNS	0.220809
SNS	0.239512
SNS	0.219236
SNS	0.251391
SNS	0.247122
SNS	0.223212
SNS	0.182138
SNS	0.201442
SNS	0.2149
SNS	0.174035
SNS	0.193407

## Sheet: 3. Single Ve area
Tissue	Value (μm2)
SGS	116.968
SGS	42.8617
SGS	80.5159
SGS	132.992
SGS	76.1096
SGS	130.588
SGS	161.432
SGS	125.381
SGS	288.816
SGS	82.9194
SGS	136.997
SGS	211.104
SGS	157.427
SGS	71.3027
SGS	70.9021
SGS	141.003
SGS	366.928
SGS	83.7206
SGS	135.395
SGS	294.023
SGS	177.055
SGS	151.819
SGS	172.649
SGS	124.98
SGS	72.1038
SGS	132.19
SGS	115.767
SGS	102.948
SGS	157.026
SGS	54.4784
SGS	74.5073
SGS	106.954
SGS	142.605
SGS	210.703
SGS	62.8906
SGS	90.9309
SGS	122.577
SGS	64.0923
SGS	147.012
SGS	110.96
SGS	260.375
SGS	122.176
SGS	289.617
SGS	159.029
SGS	97.7407
SGS	72.905
SGS	81.3171
SGS	130.989
SGS	91.3315
SGS	68.0981
SGS	73.3056
SGS	227.127
SGS	179.859
SGS	62.0894
SGS	49.6715
SGS	55.6802
SGS	188.271
SGS	145.81
SGS	207.499
SGS	58.0836
SGS	85.3229
SGS	153.421
SGS	97.3402
SGS	213.107
SGS	178.657
SGS	204.294
SGS	55.2796
SGS	84.1211
SGS	181.061
SGS	48.4698
SGS	130.187
SGS	59.6859
SGS	46.0663
SGS	93.3344
SGS	80.9165
SGS	106.553
SGS	147.412
SGS	93.735
SGS	146.611
SGS	144.208
SGS	54.0779
SGS	68.4986
SGS	121.375
SGS	136.196
SGS	138.6
SGS	166.239
SGS	161.032
SGS	76.5102
SGS	187.871
SGS	86.9252
SGS	50.8733
SGS	128.185
SGS	184.666
SGS	155.424
SGS	48.8704
SGS	108.156
SGS	46.4669
SGS	42.4611
SGS	104.951
SGS	168.643
SGS	131.389
SGS	177.456
SGS	165.839
SGS	213.507
SGS	88.5275
SGS	110.559
SGS	117.77
SGS	91.7321
SGS	143.407
SGS	52.075
SGS	287.214
SGS	145.009
SGS	96.1384
SGS	83.32
SGS	103.749
SGS	35.6513
SGS	84.5217
SGS	207.098
SGS	112.562
SGS	155.023
SGS	88.9281
SGS	205.095
SGS	156.626
SGS	171.447
SGS	142.205
SGS	44.464
SGS	122.977
SGS	96.9396
SGS	65.6946
SGS	109.758
SGS	126.182
SGS	60.0865
SGS	159.43
SGS	167.041
SGS	121.775
SGS	105.352
SGS	330.876
SGS	144.608
SGS	197.484
SGS	370.934
SGS	354.51
SGS	112.162
SGS	182.663
SGS	311.649
SGS	173.85
SGS	188.672
SGS	52.4756
SGS	92.9338
SGS	330.075
SGS	356.513
SGS	372.937
SGS	233.937
SGS	399.776
SGS	186.669
SGS	41.2594
SGS	71.7033
SGS	79.7148
SGS	172.248
SGS	162.634
SGS	289.216
SGS	320.862
SGS	148.213
SGS	57.2825
SGS	52.8761
SGS	241.948
SGS	227.528
SGS	112.963
SGS	184.265
SGS	167.441
SGS	109.357
SGS	284.41
SGS	410.591
SGS	357.315
SGS	312.049
SGS	70.1009
SGS	243.15
SGS	219.917
SGS	94.9367
SGS	395.77
SGS	148.614
SGS	280.404
SGS	124.579
SGS	195.081
SGS	133.793
SGS	115.366
SGS	191.075
SGS	197.084
SGS	37.6542
SGS	237.141
SGS	165.038
SGS	200.689
SGS	243.551
SGS	103.349
SGS	64.8934
SGS	33.6485
SGS	137.398
SGS	185.868
SGS	185.066
SGS	67.6975
SGS	66.8963
SGS	81.7177
SGS	31.6456
SGS	34.8502
SGS	36.0519
SGS	100.945
SGS	40.0577
SGS	38.4554
SGS	28.0404
SGS	193.879
SGS	189.873
SGS	214.309
SGS	50.0721
SGS	189.072
SGS	248.358
SGS	223.121
SGS	141.404
SGS	210.303
SGS	202.291
SGS	193.479
SGS	162.234
SGS	190.675
SGS	222.32
SGS	221.519
SGS	417.401
SGS	28.441
SGS	160.231
SGS	195.481
SGS	151.017
SGS	270.389
SGS	129.787
SGS	417.802
SGS	190.274
SGS	49.2709
SGS	303.637
SGS	206.297
SGS	217.513
SGS	329.675
SGS	147.813
SGS	161.833
SGS	212.306
SGS	267.986
SGS	408.188
SGS	343.695
SGS	264.381
SGS	441.836
SGS	191.476
SGS	150.617
SGS	442.637
SGS	415.799
SGS	488.303
SGS	334.482
SGS	50.4727
SGS	418.202
SGS	446.243
SGS	281.606
SGS	240.747
SGS	258.372
SGS	492.709
SGS	364.926
SGS	232.335
SGS	209.101
SGS	255.568
SGS	413.796
SGS	251.562
SGS	282.006
SGS	29.6427
SGS	426.214
SGS	306.441
SGS	216.311
SGS	194.68
SGS	182.262
SGS	44.0635
SGS	42.0606
SGS	270.79
SGS	195.882
SGS	173.049
SGS	61.6888
SGS	219.116
SGS	14.8213
SGS	249.559
SGS	308.845
SGS	185.467
SGS	312.85
SGS	146.211
SGS	307.242
SGS	318.859
SGS	393.366
SGS	173.45
SGS	362.121
SGS	396.17
SGS	434.225
SGS	335.283
SGS	376.943
SNS	451.05
SNS	270.79
SNS	400.977
SNS	358.116
SNS	306.842
SNS	533.969
SNS	302.436
SNS	466.672
SNS	429.418
SNS	439.032
SNS	155.824
SNS	318.859
SNS	284.009
SNS	495.914
SNS	358.917
SNS	309.245
SNS	173.85
SNS	203.894
SNS	420.205
SNS	315.254
SNS	246.355
SNS	305.64
SNS	431.021
SNS	527.159
SNS	190.675
SNS	288.015
SNS	512.338
SNS	251.162
SNS	326.871
SNS	403.781
SNS	356.914
SNS	368.531
SNS	326.07
SNS	302.035
SNS	354.911
SNS	414.196
SNS	371.735
SNS	290.819
SNS	281.205
SNS	188.672
SNS	348.101
SNS	338.888
SNS	259.974
SNS	271.992
SNS	226.726
SNS	391.364
SNS	541.179
SNS	171.046
SNS	734.257
SNS	192.677
SNS	316.456
SNS	465.07
SNS	140.202
SNS	158.628
SNS	167.842
SNS	213.507
SNS	200.689
SNS	205.496
SNS	243.551
SNS	448.245
SNS	438.231
SNS	295.225
SNS	215.11
SNS	388.159
SNS	174.651
SNS	92.5332
SNS	413.395
SNS	132.591
SNS	269.188
SNS	319.66
SNS	191.075
SNS	457.058
SNS	160.231
SNS	377.343
SNS	134.994
SNS	475.485
SNS	210.303
SNS	267.986
SNS	204.294
SNS	209.101
SNS	339.289
SNS	162.634
SNS	279.202
SNS	136.196
SNS	412.995
SNS	217.914
SNS	293.623
SNS	175.853
SNS	452.652
SNS	193.078
SNS	319.26
SNS	271.591
SNS	271.191
SNS	489.104
SNS	320.862
SNS	134.193
SNS	367.329
SNS	250.761
SNS	534.37
SNS	194.28
SNS	304.038
SNS	322.464
SNS	489.505
SNS	277.6
SNS	278.401
SNS	282.407
SNS	356.113
SNS	145.81
SNS	430.62
SNS	383.352
SNS	219.116
SNS	314.052
SNS	270.389
SNS	132.992
SNS	292.421
SNS	263.58
SNS	247.556
SNS	218.314
SNS	178.657
SNS	160.631
SNS	385.355
SNS	265.182
SNS	230.732
SNS	306.441
SNS	169.043
SNS	453.453
SNS	275.997
SNS	235.94
SNS	287.214
SNS	182.663
SNS	511.136
SNS	252.363
SNS	175.052
SNS	261.176
SNS	222.721
SNS	233.536
SNS	209.502
SNS	161.032
SNS	462.266
SNS	194.68
SNS	431.822
SNS	192.277
SNS	173.45
SNS	104.15
SNS	513.139
SNS	459.462
SNS	120.574
SNS	177.055
SNS	98.5419
SNS	259.574
SNS	195.481
SNS	435.026
SNS	97.7407
SNS	196.683
SNS	136.997
SNS	153.02
SNS	248.758
SNS	111.761
SNS	399.776
SNS	239.144
SNS	400.577
SNS	98.9425
SNS	180.26
SNS	141.404
SNS	372.136
SNS	469.476
SNS	196.283
SNS	431.421
SNS	191.476
SNS	217.513
SNS	149.415
SNS	169.845
SNS	183.865
SNS	419.404
SNS	614.485
SNS	495.113
SNS	300.833
SNS	335.283
SNS	482.294
SNS	296.427
SNS	264.381
SNS	82.9194
SNS	618.09
SNS	51.2738
SNS	599.263
SNS	357.315
SNS	225.525
SNS	184.265
SNS	489.905
SNS	297.629
SNS	218.715
SNS	156.626
SNS	262.378
SNS	106.553
SNS	526.759
SNS	600.064
SNS	322.865
SNS	283.208
SNS	433.424
SNS	185.467
SNS	181.061
SNS	144.208
SNS	330.075
SNS	219.516
SNS	238.343
SNS	80.5159
SNS	261.577
SNS	263.98
SNS	312.45
SNS	179.058
SNS	478.689
SNS	327.271
SNS	139.801
SNS	606.874
SNS	474.684
SNS	332.479
SNS	241.147
SNS	258.773
SNS	231.533
SNS	99.7436
SNS	346.499
SNS	429.819
SNS	220.718
SNS	165.839
SNS	263.179
SNS	529.963
SNS	224.323
SNS	243.15
SNS	213.107
SNS	186.268
SNS	433.825
SNS	592.453
SNS	142.205
SNS	202.291
SNS	370.934
SNS	488.704
SNS	312.049
SNS	98.1413
SNS	308.845
SNS	344.897
SNS	232.735
SNS	207.499
SNS	424.611
SNS	92.9338
SNS	317.657
SNS	219.917
SNS	504.326
SNS	566.416
SNS	568.419
SNS	432.623
SNS	100.144
SNS	252.764
SNS	150.617
SNS	86.5246
SNS	163.035
SNS	398.173
SNS	361.32
SNS	125.381
SNS	122.577
SNS	575.228
SNS	233.136
SNS	310.046
SNS	168.242
SNS	105.752
SNS	398.574
SNS	146.611
SNS	118.571
SNS	374.539
SNS	81.7177
SNS	216.712
SNS	109.758
SNS	205.095
SNS	170.245
SNS	401.779
SNS	59.6859
SNS	94.1356
SNS	109.357
SNS	455.856
SNS	169.444
SNS	317.257
SNS	284.41
SNS	339.689
SNS	211.505
SNS	129.386
SNS	210.703
SNS	221.118
SNS	340.49
SNS	181.461
SNS	386.557
SNS	299.631
SNS	285.211
SNS	258.372
SNS	256.369
SNS	239.946
SNS	179.859
SNS	349.704
SNS	473.482
SNS	153.421
SNS	341.692
SNS	328.072
SNS	81.3171
SNS	384.554
SNS	82.1182
SNS	71.3027
SNS	385.755
SNS	253.966
SNS	78.5131
SNS	302.836
SNS	422.208
SNS	260.776
SNS	360.92
SNS	340.891
SNS	242.75
SNS	102.948
SNS	112.162
SNS	93.3344
SNS	485.9
SNS	505.929
SNS	288.415
SNS	189.873
SNS	475.084
SNS	430.22
SNS	292.021
SNS	197.084
SNS	84.9223
SNS	120.173
SNS	201.49
SNS	413.796
SNS	110.559
SNS	509.534
SNS	376.142
SNS	208.3
SNS	279.603
SNS	274.395
SNS	296.026
SNS	273.193
SNS	358.516
SNS	332.078
SNS	89.7292
SNS	525.557
SNS	445.842
SNS	465.47
SNS	536.773
SNS	406.986
SNS	161.833
SNS	163.435
SNS	137.398
SNS	622.897
SNS	448.646
SNS	251.562
SNS	408.188
SNS	437.029
SNS	141.003
SNS	467.473
SNS	305.24
SNS	235.539
SNS	468.274
SNS	193.479
SNS	105.352
SNS	352.107
SNS	359.718
SNS	493.11
SNS	286.012
SNS	216.311
SNS	329.675
SNS	57.6831
SNS	162.234
SNS	449.447
SNS	126.582
SNS	387.358
SNS	245.954
SNS	313.652
SNS	123.778
SNS	488.303
SNS	88.1269
SNS	125.781
SNS	228.329
SNS	449.848
SNS	179.458
SNS	155.424
SNS	122.176
SNS	295.626
SNS	139
SNS	265.582
SNS	191.876

## Sheet: 4. Percentage of Ve in xylem
Tissue	Value
SGS	0.0524
SGS	0.0606476
SGS	0.0592777
SGS	0.0574874
SGS	0.0413729
SGS	0.0518002
SGS	0.0618385
SGS	0.0571809
SGS	0.069384
SGS	0.0590936
SGS	0.0660346
SGS	0.063305
SGS	0.0653271
SGS	0.0701519
SGS	0.069572
SGS	0.0560639
SGS	0.0528567
SGS	0.0507128
SGS	0.0499144
SGS	0.0665759
SGS	0.0711096
SGS	0.070844
SGS	0.0762634
SGS	0.0701743
SGS	0.0765674
SGS	0.0768141
SGS	0.0753265
SGS	0.0760069
SGS	0.0800449
SGS	0.0810975
SGS	0.0846547
SGS	0.0929803
SGS	0.0575119
SGS	0.051731
SGS	0.0541025
SGS	0.0454387
SGS	0.0493837
SGS	0.0508458
SGS	0.0534152
SGS	0.0587034
SGS	0.0654446
SGS	0.0664695
SNS	0.0733235
SNS	0.0671691
SNS	0.0690108
SNS	0.087145
SNS	0.0906061
SNS	0.0769834
SNS	0.0594659
SNS	0.0714763
SNS	0.0864579
SNS	0.100407
SNS	0.105538
SNS	0.0989677
SNS	0.0640432
SNS	0.0575151
SNS	0.0616927
SNS	0.0709167
SNS	0.0700854
SNS	0.0606538
SNS	0.0702318
SNS	0.0700538
SNS	0.0704041
SNS	0.0652142
SNS	0.067908
SNS	0.0713853
SNS	0.0855241
SNS	0.0807284
SNS	0.0836035
SNS	0.076212
SNS	0.0779231
SNS	0.0693043
SNS	0.0852431
SNS	0.0957277
SNS	0.0908968
SNS	0.0938489
SNS	0.083396

## Sheet: 5. Single WF area
Tissue	Value (μm2)
SGS	14.8213
SGS	22.4323
SGS	16.4237
SGS	14.0202
SGS	8.81269
SGS	17.2248
SGS	15.2219
SGS	11.6167
SGS	11.2162
SGS	10.8156
SGS	18.8271
SGS	28.441
SGS	40.4583
SGS	24.0346
SGS	23.634
SGS	41.2594
SGS	12.0173
SGS	8.01154
SGS	20.83
SGS	6.80981
SGS	5.60808
SGS	10.415
SGS	17.6254
SGS	12.8185
SGS	8.41211
SGS	7.61096
SGS	14.4208
SGS	9.21327
SGS	18.026
SGS	13.219
SGS	12.4179
SGS	15.6225
SGS	7.21038
SGS	22.0317
SGS	6.00865
SGS	24.4352
SGS	23.2335
SGS	20.0288
SGS	9.61384
SGS	13.6196
SGS	4.80692
SGS	16.8242
SGS	30.0433
SGS	10.0144
SGS	6.40923
SGS	18.4265
SGS	16.0231
SGS	29.6427
SGS	20.4294
SGS	5.2075
SGS	27.2392
SGS	19.6283
SGS	19.2277
SGS	34.049
SGS	37.2536
SGS	22.8329
SGS	32.0461
SGS	29.2421
SGS	24.8358
SGS	21.2306
SGS	26.0375
SGS	25.6369
SGS	28.8415
SGS	21.6311
SGS	27.6398
SGS	32.8473
SGS	35.2508
SGS	28.0404
SGS	30.8444
SGS	25.2363
SGS	26.8386
SGS	36.4525
SNS	38.4554
SNS	25.2363
SNS	20.83
SNS	18.8271
SNS	22.0317
SNS	37.2536
SNS	28.8415
SNS	28.0404
SNS	63.2911
SNS	24.8358
SNS	38.0548
SNS	44.8646
SNS	42.4611
SNS	37.6542
SNS	52.8761
SNS	54.879
SNS	39.2565
SNS	50.0721
SNS	47.2681
SNS	36.0519
SNS	49.6715
SNS	58.8848
SNS	17.6254
SNS	49.2709
SNS	46.0663
SNS	25.6369
SNS	69.2998
SNS	21.6311
SNS	54.4784
SNS	65.294
SNS	55.2796
SNS	26.0375
SNS	35.6513
SNS	32.4467
SNS	16.4237
SNS	70.5015
SNS	89.7292
SNS	42.0606
SNS	21.2306
SNS	52.4756
SNS	64.0923
SNS	41.2594
SNS	44.0635
SNS	36.4525
SNS	29.2421
SNS	57.2825
SNS	60.4871
SNS	33.6485
SNS	36.8531
SNS	48.8704
SNS	27.6398
SNS	50.4727
SNS	56.0808
SNS	44.464
SNS	15.6225
SNS	20.4294
SNS	74.9079
SNS	81.7177
SNS	56.4813
SNS	78.9136
SNS	68.0981
SNS	75.3084
SNS	70.9021
SNS	101.747
SNS	80.1154
SNS	66.8963
SNS	58.0836
SNS	71.3027
SNS	51.6744
SNS	69.7004
SNS	68.4986
SNS	80.5159
SNS	68.8992
SNS	62.49
SNS	97.7407
SNS	59.2854
SNS	62.8906
SNS	48.0692
SNS	84.5217
SNS	67.2969
SNS	56.8819
SNS	88.9281
SNS	64.8934
SNS	58.4842
SNS	78.1125
SNS	124.179
SNS	82.1182
SNS	93.735
SNS	113.764
SNS	86.124
SNS	147.012
SNS	88.1269
SNS	81.3171
SNS	185.467
SNS	152.62
SNS	91.3315
SNS	75.709
SNS	94.1356
SNS	85.7234
SNS	100.545
SNS	95.3373
SNS	108.957
SNS	109.357
SNS	77.7119
SNS	135.395
SNS	82.9194
SNS	139
SNS	87.7263
SNS	72.5044
SNS	100.945
SNS	103.349
SNS	92.5332
SNS	82.5188
SNS	94.9367
SNS	108.556
SNS	116.968
SNS	113.363
SNS	151.017
SNS	207.098
SNS	162.234
SNS	83.32
SNS	125.781
SNS	116.167
SNS	87.3258
SNS	120.974
SNS	110.96
SNS	164.637
SNS	114.565
SNS	109.758
SNS	120.574
SNS	104.951
SNS	118.571
